# Supplementary material
Source: HighWire-hosted journal article supplement (https://cmaj.ca/highwire/filestream/57887/field_highwire_adjunct_files/0/strongy-kain-table.pdf)
Supplement: strongy-kain-table.pdf [file strongy-kain-table.pdf]

**e-Table: Summary of cases of complicated or disseminated\* strongyloidiasis**

| Case | Age, sex, place of birth | Presentation                                                                                                                                                      | Specimen site where <i>Strongyloides stercoralis</i> first isolated     | Risk factors                                                                      | Treatment and follow-up                                                                         | Comments                                                                                                                                |
|------|--------------------------|-------------------------------------------------------------------------------------------------------------------------------------------------------------------|-------------------------------------------------------------------------|-----------------------------------------------------------------------------------|-------------------------------------------------------------------------------------------------|-----------------------------------------------------------------------------------------------------------------------------------------|
| 1    | 61 M, Cambodia           | Nausea, vomiting, acute renal failure; dissemination                                                                                                              | Sputum                                                                  | Prednisone 5 mg once daily x 4 yr for arthritis; renal failure; diabetes mellitus | Albendazole 400 mg twice daily and ivermectin 15 mg once daily x 5 d; died                      | <i>Escherichia coli</i> bacteremia                                                                                                      |
| 2    | 24 F, Grenada            | Painful knees, ankles, feet, back, abdominal pain, nausea, vomiting, fatigue; dissemination                                                                       | Sputum                                                                  | HTLV-1-associated T-cell leukemia                                                 | Thiabendazole; radiation, zidovudine and alpha-interferon for leukemia; lost to follow-up       | Eosinophilia present (eosinophil count $0.85 \times 10^9/L$ )                                                                           |
| 3    | 66 M, Jamaica            | Repeated episodes of nausea, vomiting, weight loss                                                                                                                | Duodenal biopsy, gastric aspirate, <i>Strongyloides</i> serology, stool | HTLV-1 infection                                                                  | Albendazole 800 mg once daily x 7 d and ivermectin 12 mg x 1 dose; clinically well at follow-up | Refractory strongyloidiasis unresponsive to standard albendazole treatment; no eosinophilia                                             |
| 4    | 50 M, Jamaica            | Nausea, vomiting, dehydration with calcium concentration 5 mmol/L at presentation; management of hypercalcemia included corticosteroids; subsequent dissemination | Sputum                                                                  | HTLV-1 hematologic cancer; corticosteroids                                        | Died                                                                                            | No eosinophilia                                                                                                                         |
| 5    | 75 M, Jamaica            | Malaise, weight loss, anorexia; dissemination to lung and CNS                                                                                                     | Sputum                                                                  | Chronic alcohol use                                                               | Albendazole 400 mg twice daily and ivermectin; lost to follow-up                                | Larva currens;† no eosinophilia                                                                                                         |
| 6    | 38 M, Guyana             | Epigastric pain, vomiting, weight loss                                                                                                                            | Stool                                                                   | N/A                                                                               | Albendazole 800 mg once daily x 7 d and ivermectin; died                                        | End-stage AIDS‡ (CD4 count 92); <i>Klebsiella</i> bacteremia and pneumonia; concurrent CNS toxoplasmosis, pulmonary TB; no eosinophilia |
| 7    | 37 F, Southeast Asia     | Nausea, anorexia, then cough; dissemination                                                                                                                       | Sputum                                                                  | SLE with corticosteroid pulse                                                     | Died                                                                                            | N/A                                                                                                                                     |
| 8    | 73 M, Guyana             | COPD exacerbation, weight loss, fatigue; dissemination                                                                                                            | Sputum                                                                  | Prednisone 10 mg once daily                                                       | Ivermectin; lost to follow-up                                                                   | No eosinophilia at presentation; eosinophilia after therapy (eosinophil count max $1.54 \times 10^9/L$ )                                |
| 9    | 28 F, Southeast Asia     | Chronic peripheral edema, then productive cough; dissemination                                                                                                    | Sputum, lung biopsy                                                     | SLE, lupus nephritis with high-dose corticosteroids                               | Died                                                                                            | Concurrent PCP; no eosinophilia                                                                                                         |
| 10   | 89 M, Italy              | Vasculitis of unclear cause; clinician about to prescribe corticosteroids when incidental eosinophilia noted; stool sample sent for O+P screening                 | Stool                                                                   | Cirrhosis, prostate cancer                                                        | Thiabendazole; clinically well at follow-up                                                     | Italian army officer posted in Ethiopia 1930–1940; eosinophilia present (eosinophil count max $2.54 \times 10^9/L$ )                    |

---

Note: HTLV-1 = human T-cell lymphotropic virus type 1, CNS = central nervous system, TB = tuberculosis, SLE = systemic lupus erythematosus, COPD = chronic obstructive pulmonary disease, PCP = *Pneumocystis pneumonia*, O+P = ova and parasites.

\*Dissemination refers to pulmonary dissemination unless otherwise specified.

†Larva currens is a distinctive perianal, rapidly moving and pruritic linear eruption due to migration of the larvae that is virtually pathognomonic of strongyloidiasis.

‡Early studies suggested that HIV was a risk factor for strongyloidiasis. Evidence now suggests that strongyloidiasis is a serious but rare complication of late-stage HIV disease and that HIV-infected patients from a strongyloidiasis-endemic area with appropriate symptoms should be evaluated for possible strongyloidiasis. However, HIV itself is not a major risk factor for hyperinfection syndrome.
